# Supplementary material
Source: PubMed Central journal article supplement (PMC3007626)
Supplement: supp_00030.2010_suppdata.pdf [file supp_00030.2010_suppdata.pdf]

# 1 Long-Term Depression at Parallel Fiber to Golgi cell Synapses

2 Q. Robberechts, M. Wijnants, M. Giugliano and E. De Schutter

3

4

## Supplementary material

5

6 Long-term depression of parallel fiber to Golgi cell synaptic responses, upon  
7 voltage-clamp based induction protocols in parasagittal slices

8 In a separate series of experiments we tested whether parallel fiber (PF)-  
9 Golgi cell (GoC) LTD could be induced in voltage clamp (V-clamp) on  
10 parasagittal slices. The GoC viability in the parasagittal orientation is better  
11 than in the coronal slice orientation, since GoCs are in general parasagittally  
12 organized (Sillitoe et al. 2008; Barmack and Yakhnitsa 2008), but it was much  
13 more difficult to stimulate the cut PFs.

14 Methods were similar to the ones presented in the main text and only  
15 differences with the methods used in coronal slices are mentioned here.

16 Slices from the vermis of the cerebellum were cut in the parasagittal plane at  
17 a thickness of 250-270  $\mu\text{m}$ . A field-pipette filled with ACSF was employed to  
18 deliver monopolar extracellular electrical stimuli to the PFs. This electrode  
19 was placed in the ML and positioned so that EPSCs could be evoked.

20 Two different stimulation protocols were used: a 'burst' IP, similar to the one  
21 used in coronal slices (see main text, Methods) and a 'burst + depol' IP  
22 protocol. In the latter the stimulation train was combined with a depolarization  
23 to 0 mV: bursts of 20 pulses at 100 Hz paired with a postsynaptic  
24 depolarization step to 0 mV lasting 200 ms, repeated 30 times with an  
25 interburst interval of 2 seconds.

26 A schematic representation of the recording and stimulating pipette in the  
27 parasagittal slice are shown in Figure S1C.  $C_m$  was  $131 \pm 11$  pF (range: 47-  
28 321 pF;  $n=30$ ) and  $R_{\text{input}}$  was  $205 \pm 18$  M $\Omega$  (range: 72-511 M $\Omega$ ;  $n=30$ ) for  
29 GoCs recorded in parasagittal slices. These passive cell parameters are  
30 similar to the parameters measured in the coronal slice.

31 Control experiments, whereby no IP was applied but where EPSCs were  
32 continuously monitored at 0.1 Hz, showed a moderate decrease of the EPSC

33 amplitude over the 50 min recording period ( $-10 \pm 5\%$  change at  $t = 25-35$   
34 min;  $n = 10$ ) (Figure S1D). Robust LTD was evoked with the 'bursts + depol'  
35 IP (Figure S1B, D). Representative averaged traces of evoked EPSCs  
36 waveforms (Figure S1A) are reported in correspondence of 5 min pre-IP and  
37 of 30 min post-IP, from time points indicated by open bars in (Figure S1B).  
38 LTD of EPSCs amplitude is evoked by the 'bursts + depol' IP in a sample  
39 experiment (Figure S1B). This 'bursts + depol' IP generally resulted in an  
40 immediate and pronounced depression followed by a significant sustained  
41 decrease of the amplitude of the evoked EPSCs ( $-41 \pm 5\%$  change at  $t = 25-$   
42  $35$  min post-IP;  $n = 14$ ;  $p < 0.01$  compared to the control group) (Figure S1D,  
43 F). 8 out of 14 experiments showed both an immediate and sustained  
44 depression following the IP (Figure S1B), 5 out of 14 showed a slow  
45 progression towards depression, usually stabilizing 15-20 min post-IP, and  
46 one experiment did not show any change in activity.

47 Additional experiments were performed on parasagittal slices using the same  
48 IP but without the depolarization step. This 'bursts only' IP was also capable  
49 of inducing LTD, but showed a more progressive decrease following the IP. A  
50 sustained decrease in the amplitude of the EPSCs was also observed after  
51 about 20 min ( $-44 \pm 12\%$  change at  $t = 25-35$  min post-IP;  $n = 7$ ;  $p < 0.05$   
52 compared to the control group; no significant difference between 'bursts +  
53 depol' IP and 'bursts only' IP) (Figure S1D, F).

54 Under the same experimental conditions, changes in the paired pulse ratios  
55 (PPRs) were investigated as a potential landmark of alterations in presynaptic  
56 release probability. We considered both induction protocols, including or  
57 excluding post-synaptic depolarization (Figure S1E). The LTD following  
58 'bursts and depol' IP was associated with a sustained and significant increase  
59 in the PPR ( $1.65 \pm 0.13$  at 10 min pre-IP versus  $1.94 \pm 0.16$  at  $t = 25-35$  min  
60 post-IP;  $n = 14$ ;  $p < 0.01$ ). The LTD following 'bursts only' IP was instead  
61 associated with a smaller and non significant increase of the PPR ( $1.82 \pm 0.20$   
62 at 10 min pre-IP versus  $2.01 \pm 0.14$  at  $t = 25-35$  min post-IP;  $n = 7$ ;  $p = 0.37$ ).

63 In (Figure S1F) for both IP protocols, the percentage change in EPSC  
64 amplitude averaged over 25 to 35 min post-IP is significantly different than in  
65 the control ( $*p < 0.05$  and  $**p < 0.01$ ).

66

## Supplemental Figure 1

67

68

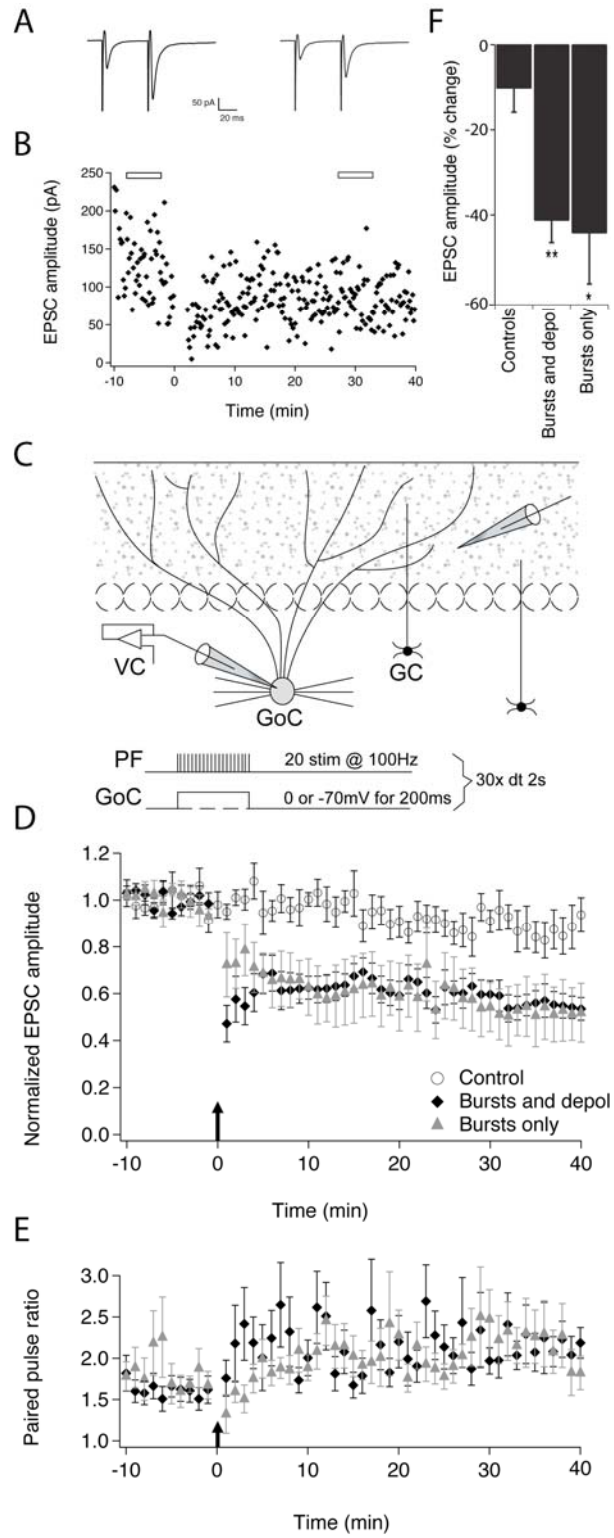

69

70

71 Example response of Golgi cell during C-clamp IP

72 A superimposed image of the 30 traces during the C-clamp IP is shown where  
73 initially the cell spikes and progressively the EPSPs become smaller. The first  
74 trace is colored red and the last trace is colored blue.

75

76

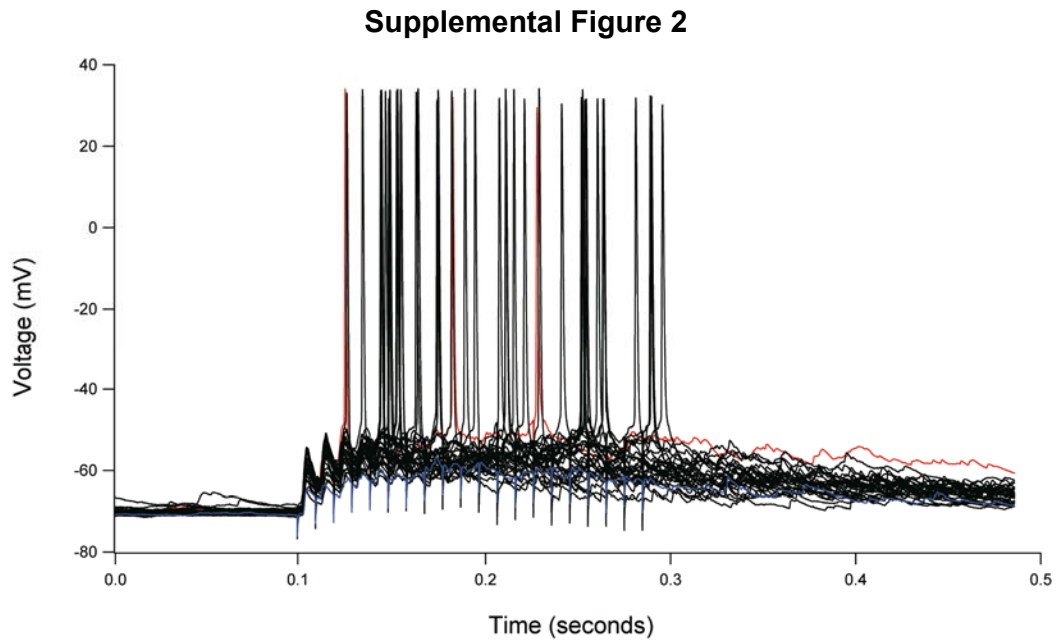

### 80 Relationship between EPSCs, PPR and extracellular $\text{Ca}^{2+}$ concentration

81 Because GoC apical dendrites are quite thin and excitatory synapses from  
82 PFs are made on spine-like protrusions it cannot be excluded that small  
83 changes in PPR are difficult to detect at the level of the soma. Lowering the  
84 extracellular  $\text{Ca}^{2+}$  concentration is a purely presynaptic mechanism to induce  
85 depression of the EPSCs and the accompanying amount of change in the  
86 PPR recorded at the soma is indicative of the reliability of this parameter for  
87 detecting changes in presynaptic activity. To test this we performed a series  
88 of experiments whereby the responses of paired EPSCs and their respective  
89 PPRs were measured while over time the extracellular  $\text{Ca}^{2+}$  concentration  
90 was systematically lowered. On the basis of these measurements one can  
91 have an idea how reliable the PPR test is for discriminating between the pre-  
92 and postsynaptic locus of plasticity.

93 EPSCs were evoked by stimulating the ML at a certain stimulation intensity  
94 arbitrarily chosen at the beginning of each of the recordings. The stimulation  
95 intensity was afterwards unchanged all through the recording. Passive cell  
96 parameters were continuously tested during the whole recording and as soon  
97 as significant changes occurred in one or more of these parameters we  
98 stopped the recording. The EPSCs were evoked at a standard frequency of  
99 0.1 Hz for 10 minutes in each new condition, leading up to a series of 60  
100 consecutive paired EPSCs per extracellular  $\text{Ca}^{2+}$  concentration group. 5  
101 minutes were allowed and were sufficient for change of concentration. EPSCs  
102 were monitored during this transition period at a frequency of 0.033 Hz.  
103 Perfusion speed of bubbled ACSF was 3-4 ml per minute. The EPSCs were  
104 recorded at 2.00, 1.75, 1.50, 1.25, 1.00, 0.50, 0.00 and back to 2.00 mM  
105 extracellular  $\text{Ca}^{2+}$  concentration. Changes in extracellular  $\text{Ca}^{2+}$  were  
106 compensated by a reciprocal increase of the  $\text{Mg}^{2+}$  concentration to keep the  
107 osmolality of the solution equal.

108 An example recording is shown in Figure S3A. What is shown is the mean  
109 EPSC of the 60 consecutive paired EPSCs per extracellular  $\text{Ca}^{2+}$   
110 concentration group. At the end of the recording as a control the  $\text{Ca}^{2+}$   
111 concentration was returned to initial value as a control of the quality of the  
112 recording and the cell. Figure S3B summarizes the normalized values for the  
113 EPSC amplitudes of 9 recordings. EPSCs were half their initial value when

114 moving from 1.50 to 1.25 mM extracellular  $\text{Ca}^{2+}$  concentration as shown in  
115 Figure S3B. The PPR is summarized for these 9 recordings in Figure S3C.  
116 The average and the variability of the PPRs increased while  $\text{Ca}^{2+}$  was  
117 decreasing. A quasi-linear increase was observed from 2.00 to 1.00 mM  $\text{Ca}^{2+}$ .  
118 From 1.50 mM there was a significant difference with the PPRs of the starting  
119 conditions.

120 The typical amount of depression observed during our PF-GoC LTD  
121 experiments was in the order of 25-30%. This corresponds to lowering the  
122 extracellular  $\text{Ca}^{2+}$  concentration to halfway between 1.75 and 1.50 mM. This  
123 corresponds in Figure S3C to an increase of the PPR of 10-15%, which is not  
124 significantly different from the PPR measured at 2.00 mM extracellular  $\text{Ca}^{2+}$   
125 concentration. It is thus not excluded that small changes of the PPR at  
126 electrotonically distant sites, which are difficult to measure, could still  
127 contribute to the depression observed.

128 Measuring the PPR is still a valuable tool for determining the origin of the  
129 plasticity observed since an increase of the PPR is observed when a purely  
130 presynaptic depression of the EPSCs is induced, as was the case during the  
131 transient PTP that was sometimes observed.

132

133

134

135

136

137

138

139

140

141

142

143

144

145

146

147

148

## Supplemental Figure 3

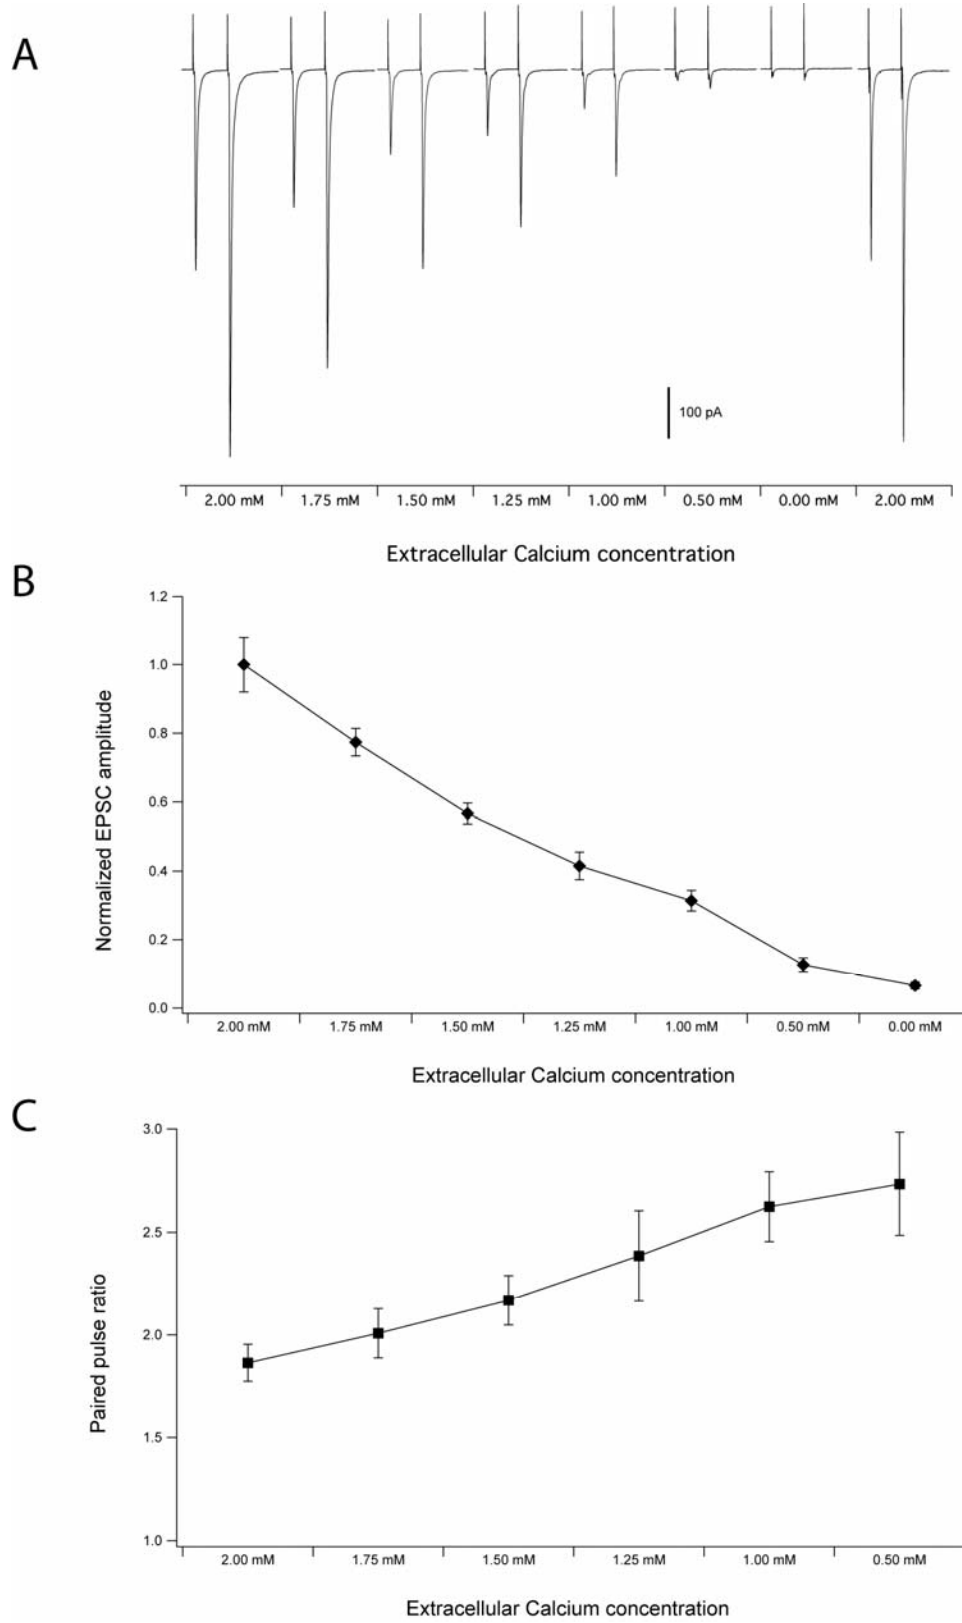

149
